# Supplementary material
Source: PubMed Central journal article supplement (PMC4115497)
Supplement: 1400542111_pnas.201400542SI.pdf [file 1400542111_pnas.201400542SI.pdf]

# Supporting Information

Zhang et al. 10.1073/pnas.1400542111

## SI Materials and Methods

**Materials, Growth Conditions, and Treatments.** All plants are in *Columbia* background. The *pMP::MP-GFP* transgenic line is a generous gift from Dolf Weijers (Laboratory of Biochemistry, Wageningen University, Wageningen, The Netherlands) (1). For phenotype and some quantitative RT-PCR (qRT-PCR) analyses, seeds were grown on Murashige and Skoog (MS) agar plate (with 2% sucrose) (2) with ethanol or various concentrations of 2,4-D or 5  $\mu$ M dexamethasone (DEX). To construct *35S::iaaM-HA*, the *iaaM* gene fused with 3 $\times$  HA epitope was amplified into pHB vector (3). *35S::iaaL-HA* transgenic plants and the quadruple mutant *tir1 afb1 afb2 afb3* were as described (4). The *taa1 tar1 tar2* (CS16419) mutant was obtained from the Arabidopsis Biological Resource Center at Ohio State University. *MP $\Delta$ III/IV* (domain III/IV is deleted) (5) was amplified into pCambia1300 with 35S promoter driving the fusion with the hormone-binding domain of the rat glucocorticoid receptor (5). For *pXVE::bdl* construction, a gain-of-function form of *bdl* was generated and inserted into the pER10 vector (6). For  $\beta$ -estradiol treatment, *pXVE::bdl* seeds were grown on MS agar plate with 0.1% DMSO (as control) or 10 nM  $\beta$ -estradiol, respectively. The weak *mp* allele *mp<sup>S379</sup>* (1) corresponds to SALK\_021319. For time-course assay, the fusion gene *LUC-NLS-sGFP* was constructed to be driven by 511 bp upstream of *TMM* gene in pCambia1300 with nos terminator, and the resulting construct was introduced into *arf5-1/+*. The WT-like and *arf5-1/-* siblings segregated from *pTMM::LUC-NLS-sGFP;arf5-1/+* were used for analysis. For transient expression analysis, 2-d-old seedlings were transiently treated with 150 nM 2,4-D for indicated time. To construct *pSTOMAGEN::LUC*, a 2-kb fragment directly upstream of the ATG of the *STOMAGEN* gene fused with *firefly* luciferase gene was cloned into pCambia1300, and the resulting construct was introduced into *arf5-1/+* to generate *pSTOMAGEN::LUC;arf5-1/+* transgenic lines. For constructing *pSTOMAGEN::GUS*, a 2-kb fragment directly upstream of the ATG of the *STOMAGEN* gene was amplified into pEarlyGate 164 (7), which carries a  $\beta$ -glucuronidase gene, and the resulting vector was introduced into *arf5-1/+* to generate *pSTOMAGEN::GUS;arf5-1/+* transgenic lines. The *pMP::MP-MYC-HA* fusion was generated by placing 6 $\times$ MYC-3 $\times$ HA epitope at the 3' end of genomic *MP* fragment in pCambia1300 with a nos terminator. The construct was introduced into *arf5-1/+* and complements the rootless mutant phenotype. For all analyses, seedlings were grown on MS medium with 2% sucrose under continuous white light of  $\sim 90 \mu\text{mol}\cdot\text{m}^{-2}\cdot\text{s}^{-1}$  at 24  $^{\circ}\text{C}$ . For *STOMAGEN-RNAi* construction, miR319 backbone was used to construct artificial miRNA targeting *STOMAGEN* (8, 9) and the resulting construct was introduced into *arf5-1/+*. The WT-like and *arf5-1/-* siblings segregated from *STOMAGEN-RNAi;arf5-1/+* transgenic lines were used for analysis. For *pXVE::MP-Myc* and *pXVE::MP* construction, PCR-amplified fragments encoding MP-Myc and MP were inserted into the pER10 vector, respectively (6). For  $\beta$ -estradiol treatment, transgenic *pXVE::MP-Myc* and *pXVE::MP* seedlings were treated with DMSO or 10  $\mu$ M  $\beta$ -estradiol overnight, respectively.

**Stomatal Phenotype Analyses.** Cotyledons of 8-d-postgermination seedlings were transiently preserved in 5% (wt/vol) NaOH solution at 100  $^{\circ}\text{C}$  for  $\sim 10$  s, washed with distilled water, and placed in the clear solution (glycerol/chloral hydrate/water, 1:8:1, vol/wt/vol) overnight or for a few days. Two images at 200 $\times$  magnification

(0.2  $\text{mm}^2$ ) were captured per cotyledon using Leica DM2500 microscope with Nomarski optics.

**RNA Isolation and Quantitative RT-PCR.** Total RNAs were isolated using a RNeasy Plant kit (Qiagen). cDNA was reverse-transcribed using iScript cDNA Synthesis kit (Bio-Rad). SYBR Premix Ex Taq II (TaKaRa) was used for qPCR on a CFX96 Real-Time System (Bio-Rad). *STOMAGEN*-specific signal was normalized relative to *ACTIN2* expression.

**GUS Staining.** GUS staining was performed as previously described (8) with minor modifications. Briefly, the plants were fixed with 90% acetone at 4  $^{\circ}\text{C}$  for at least 7 h, then washed with 64 mM  $\text{Na}_2\text{HPO}_4$ , 36 mM  $\text{KH}_2\text{PO}_4$ , and finally stained in wash solution with 10 mM EDTA, 0.5 mM  $\text{K}_3\text{Fe}(\text{CN})_6$ , 0.5 mM  $\text{K}_4\text{Fe}(\text{CN})_6$ , 0.1% (vol/vol) Triton-100, 10% methanol, and 1  $\text{mg}\cdot\text{mL}^{-1}$  X-Gluc (DMF) at 37  $^{\circ}\text{C}$  for 30 min to 1 h.

**ChIP Assay.** ChIP was performed with 2 g of 7-day postgermination (dpg) seedlings (dark-adapted overnight at 6 dpg) of *pMP::MP-MYC-HA* and WT according to the methods described previously (10) with minor modifications. Briefly, seedlings were harvested in dim green safe light and fixed in fixation buffer [0.4 M sucrose, 10 mM Tris-HCl (pH 8.0), 1% formaldehyde, 5 mM  $\beta$ -mercaptoethanol] by vacuum infiltration at 4  $^{\circ}\text{C}$ . Glycine was added to a final concentration of 0.125 M to stop the reaction under vacuum. Then seedlings were rinsed with water, ground into fine powder in liquid nitrogen, and homogenized in extraction buffer I [0.4 M sucrose, 10 mM Tris-HCl (pH 8.0)], filtered through four layers of Miracloth and centrifuged at 2,880  $\times g$  for 20 min at 4  $^{\circ}\text{C}$ . Pellet was then resuspended in extraction buffer II [0.25 M sucrose, 10 mM Tris-HCl (pH 8.0), 10 mM  $\text{MgCl}_2$ , 1% Triton-X 100, 5 mM  $\beta$ -ME, 1 mM Pefabloc (Roche Diagnostics), Complete Protease Inhibitor Cocktail (Roche Diagnostics)], centrifuged at 13,400  $\times g$  for 10 min, resuspended in nuclei lysis buffer [50 mM Tris-HCl (pH 8.0), 10 mM EDTA, 1% SDS, 1 mM Pefabloc, Complete Protease Inhibitor Cocktail]. Chromatin extracts were sonicated to  $\sim 300$ - to 1,000-bp fragments with a sonicator (VCX 750; Sonics) and centrifuged at 12,000 rpm for 10 min. Soluble chromatin extracts were diluted in 10 $\times$  ChIP dilution buffer [1.1% Triton-X 100, 1.2 mM EDTA, 16.7 mM Tris-HCl (pH 8.0), 167 mM NaCl, 1 mM Pefabloc, complete protease inhibitor cocktail], incubated with anti-HA antibody (1:2,000, sc-7392; Santa Cruz) for 3 h, then immunoprecipitated with Dynabeads Protein G (10  $\mu\text{L}$ ; Life Technologies) saturated previously with salmon sperm DNA and BSA. Immunocomplexes were then washed with four different buffers: low-salt buffer [150 mM NaCl, 0.1% SDS, 1% Triton X-100, 2 mM EDTA, 20 mM Tris-HCl (pH 8.0)] once, high-salt buffer [500 mM NaCl, 0.1% SDS, 1% Triton X-100, 2 mM EDTA, 20 mM Tris-HCl (pH 8.0)] twice, LiCl wash buffer [0.25 M LiCl, 1% Nonidet P-40, 1% sodium deoxycholate, 2 mM EDTA, 20 mM Tris-HCl (pH 8.0)] twice, and TE [1 mM EDTA, 10 mM Tris-HCl (pH 8.0)] once on ice each for 10 min. The bound chromatin fragments were eluted with elution buffer (1% SDS, 0.1 M  $\text{NaHCO}_3$ ) and reversed by incubating at 65  $^{\circ}\text{C}$  overnight. The mixture was treated with Proteinase-K to remove proteins. The genomic DNA was purified by phenol/chloroform/isoamyl alcohol (25:24:1) and ethanol precipitation. The resulting DNA was used for qPCR. IP/input was calculated by comparing the  $C_t$  values between immunoprecipitate and input. The NC1 fragment in the *STOMAGEN*

coding region and the NC2 fragment in the chromatin adjacent to 3' UTR region of *STOMAGEN* gene were used as controls.

**Recombinant Protein Purification and EMSA.** For cloning MBP-MP and His-MP-DBD (residues 120–274), fragments encoding MP and MP-DBD were introduced into pMAL-c2X (New England BioLabs) and pET32a, respectively. MBP-MP and MBP were expressed in *Escherichia coli* (strain BL21), purified with amylose resin (NEB), and ultrafiltrated into TBS solution plus 10% glycerol. His-MP-DBD was expressed in *E. coli* (strain BL21), purified with Ni-NTA resin and ultrafiltrated into TBS solution plus 10% glycerol.

For the EMSA assay, a kit was used with 200 ng of MBP or MBP-MP and 20 fmol biotin-labeled probes, according to the manufacturer's instructions (Thermo Scientific).

**DNA-Protein Pull-Down Assay.** DNA-protein pull-down assay was performed as described previously (11, 12) with modifications. Briefly, 10 pmol biotin-labeled probes were first incubated with 10  $\mu$ L streptavidin magnetic beads (Thermo Scientific) for 2 h in a buffer [10 mM Tris-HCl (pH 7.5), 50 mM KCl, 5 mM MgCl<sub>2</sub>, 2.5% glycerol, 0.05% Nonidet P-40], then the free probes were washed out with the buffer. The probes-bound beads were incubated with 200 ng MBP or MBP-MP proteins unless otherwise stated in 100  $\mu$ L of the same buffer supplemented with 5  $\mu$ g fragmented salmon sperm DNA and 10  $\mu$ g BSA for 1 h, then washed three times with 1 mL buffer for each time. The precipitates were eluted in SDS loading buffer and subjected to Western blot analysis with anti-MBP monoclonal antibody (NEB). For competition, 100 ng MBP or MBP-MP were pre-incubated with 100 pmol unlabeled probes in 100  $\mu$ L of buffer supplemented with 5  $\mu$ g fragmented salmon sperm DNA and 10  $\mu$ g BSA for 1 h, then the mixture was incubated with 10 pmol biotin-labeled probes-bound streptavidin magnetic beads (10  $\mu$ L) for 1 h. After three washes with 1 mL buffer for each time, the

precipitates were eluted in SDS loading buffer and subjected to Western blot analysis with anti-MBP monoclonal antibody (NEB).

**Luciferase and Dual-Luciferase Assays.** For luciferase activity assay in *Arabidopsis*, seedlings were harvested and homogenized in 100  $\mu$ L lysis buffer (Promega), centrifuged, and then 10  $\mu$ L supernatant was incubated with 50  $\mu$ L substrate solution for 10 s and the luciferase activity was recorded for 10 s by GloMax 20/20 Luminometer (Promega). Simultaneously, 3  $\mu$ L supernatant was used for Bradford assay to determine protein amount. The ratio of luciferase activity to total protein amount was calculated and presented.

For dual-LUC assays, 2-kb or 1-kb fragments directly upstream of the ATG of the *STOMAGEN* or *ARR15* genes were cloned into pGreen0800-LUC, which carries both *renilla* (REN) driven by 35S promoter and *firefly luciferases* (*LUC*) genes (13). Deleted and mutated *STOMAGEN* promoter fragments were directly introduced into pGreen0800-LUC except that the fragment with deletion of the –500-bp region was first fused with minimal 35S (m35S), and mutation fragments were generated by site-directed mutagenesis in pBluescript SK+ vector. Effector constructs were generated by introducing CFP and MP-CFP into pKYL71, respectively. *Agrobacteria* (GV3101) harboring effector constructs (including 35S-CFP, 35S-MP-CFP) or reporter constructs were adjusted to OD<sub>600</sub> = 0.6 in MS medium with 200  $\mu$ M acetosyringone and 10 mM MES (pH 5.6), left at room temperature for 3 h, and a mixture of *Agrobacteria* harboring effector and reporter (MS medium/effector/reporter = 2:2:1, vol/vol/vol) was introduced into 3- to 4-wk-old tobacco (*Nicotiana benthamiana*) leaves by infiltration. After 40–48 h, leaves were collected for the dual-LUC assay.

**Anti-MP Antibody Generation.** The recombinant MP-specific fragment (residues 526–775) in middle region domain was used to immunize rabbit to generate anti-MP polyclonal antibody.

- Schlereth A, et al. (2010) MONOPTEROS controls embryonic root initiation by regulating a mobile transcription factor. *Nature* 464(7290):913–916.
- Murashige T, Skoog F (1962) A revised medium for rapid growth and bio assays with tobacco tissue cultures. *Physiol Plant* 15(3):473–497.
- Mao J, Zhang YC, Sang Y, Li QH, Yang HQ (2005) From the cover: A role for *Arabidopsis* cryptochromes and COP1 in the regulation of stomatal opening. *Proc Natl Acad Sci USA* 102(34):12270–12275.
- Mai YX, Wang L, Yang HQ (2011) A gain-of-function mutation in *IAA7/AXR2* confers late flowering under short-day light in *Arabidopsis*. *J Integr Plant Biol* 53(6):480–492.
- Lau S, De Smet I, Kolb M, Meinhardt H, Jürgens G (2011) Auxin triggers a genetic switch. *Nat Cell Biol* 13(5):611–615.
- Zuo J, Niu QW, Frugis G, Chua NH (2002) The *WUSCHEL* gene promotes vegetative-to-embryonic transition in *Arabidopsis*. *Plant J* 30(3):349–359.
- Earley KW, et al. (2006) Gateway-compatible vectors for plant functional genomics and proteomics. *Plant J* 45(4):616–629.
- Sugano SS, et al. (2010) Stomagen positively regulates stomatal density in *Arabidopsis*. *Nature* 463(7278):241–244.
- Schwab R, Ossowski S, Riester M, Warthmann N, Weigel D (2006) Highly specific gene silencing by artificial microRNAs in *Arabidopsis*. *Plant Cell* 18(5):1121–1133.
- Xu J, et al. (2010) The *ABORTED MICROSPORES* regulatory network is required for postmeiotic male reproductive development in *Arabidopsis thaliana*. *Plant Cell* 22(1):91–107.
- Bai MY, et al. (2012) Brassinosteroid, gibberellin and phytochrome impinge on a common transcription module in *Arabidopsis*. *Nat Cell Biol* 14(8):810–817.
- Vert G, Chory J (2006) Downstream nuclear events in brassinosteroid signalling. *Nature* 441(7089):96–100.
- Hellens RP, et al. (2005) Transient expression vectors for functional genomics, quantification of promoter activity and RNA silencing in plants. *Plant Methods* 1:13.

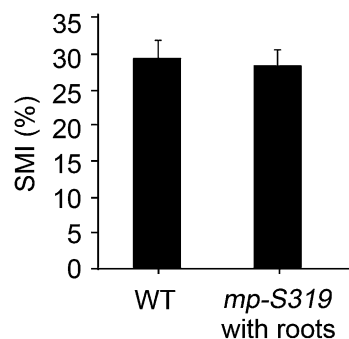

**Fig. S1.** There are no significant differences between the stomata and meristemoid indexes (SMIs) of WT and that of *mp-S319* homozygote with roots. The SMIs obtained from 8-d-old seedlings of WT and *mp-S319* homozygotes with roots segregated from *mp-S319* heterozygote. Data are means  $\pm$  SDs ( $n = 10$ ).

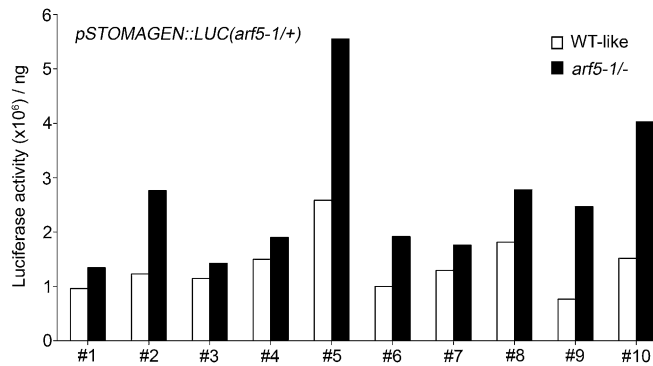

**Fig. S2.** Luciferase activities are higher in *arf5-1* than in WT-like progenies of *pSTOMAGEN::LUC;arf5-1/+* transgenic seedlings. Ten independent *pSTOMAGEN::LUC;arf5-1/+* lines were randomly selected. WT-like and *arf5-1*<sup>-</sup> (rootless) seedlings were harvested from individual lines and subjected to analyses, respectively. Luciferase activities relative to total protein amount were calculated and presented.

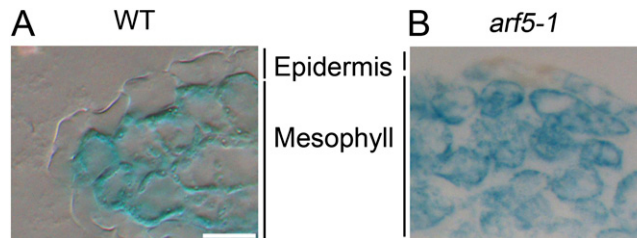

**Fig. S3.** GUS staining of *pSTOMAGEN::GUS* cotyledons. (A and B) Cross-section of the cotyledons of 7-dpg *pSTOMAGEN::GUS* seedlings show GUS activity in WT mesophyll (A) and in mesophyll and epidermis of *arf5-1*. (Scale bar: 20  $\mu$ m.)

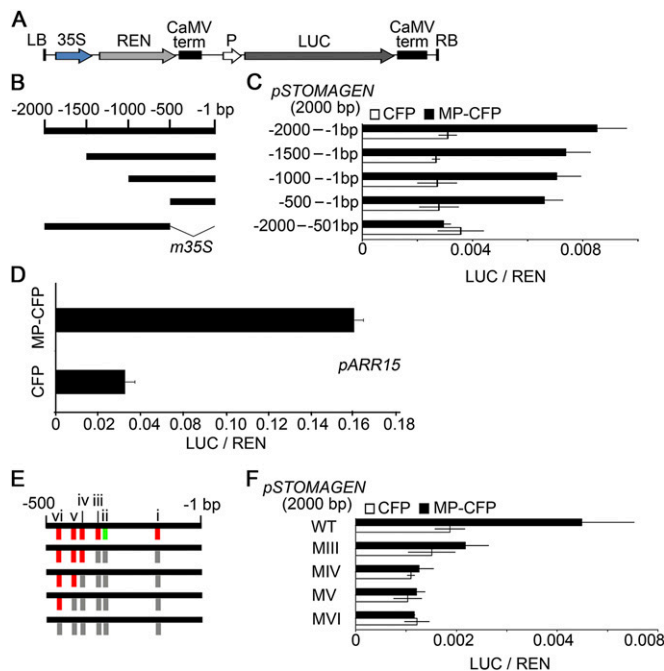

**Fig. S4.** Auxin response elements (AuxREs) within the  $-500$ -bp region mediate MP regulation of *STOMAGEN* expression in tobacco. (A) The construct for dual-LUC assay. P indicates the site for promoter insertion. LUC and REN represent *firefly* and *renilla* luciferase, respectively. (B, C, E, and F) Dual-LUC assay showing MP regulation of *STOMAGEN* promoter in tobacco leaves. *m35S*, minimal 35S promoter. (E, *i*–*vi*) AuxREs at different positions. The gray boxes denote mutated AuxREs (GCCA or GAGCCA). WT and MIII–MVI (F) indicate wild-type promoter and promoters with 3–6 mutated AuxREs corresponding to E, respectively. (D) Dual-LUC assay showing MP regulation of *ARR15* promoter in tobacco leaves. Data are means  $\pm$  SDs ( $n = 4$ , C) or ( $n = 3$ , D and F).



**Table S1. Primers used in this study**

| Purpose or construct name     | Oligonucleotide   | Sequence (5' > 3')                                                            |
|-------------------------------|-------------------|-------------------------------------------------------------------------------|
| RT-qPCR                       | ACT2-S            | AAGCTGGGGTTTTATGAATGG                                                         |
|                               | ACT2-AS           | TTGTCACACACAAGTGCATCAT                                                        |
|                               | STOMAGEN-S        | TAGGGTCGACAGCACCAACTTGTC                                                      |
|                               | STOMAGEN-AS       | TCATTTCCCTCGACTGGAACCTGCT                                                     |
| ChIP-qPCR                     | NC1-S             | ATACGGTCTCCCTTCTCCCA                                                          |
|                               | NC1-AS            | TAAATCCATTGTTCCCTGTC                                                          |
|                               | NC2-S             | TTCGCCAATAGCGTTATCAAG                                                         |
|                               | NC2-AS            | CCACCATCATTCACCATCATC                                                         |
|                               | 1-S               | TGTTCCCTTGTCCACATACTTATTTG                                                    |
|                               | 1-AS              | AGATGTATACCAATCCTTCCGTTT                                                      |
|                               | 2-S               | CAATGTTTTGATGCTCTAGAAGGT                                                      |
|                               | 2-AS              | GCAAAGAATTAAAGAGAGATAGG                                                       |
|                               | 3-S               | AAGTTCATACGAGTTCAAAGAGGAG                                                     |
|                               | 3-AS              | AACATGTCCAACTGTTTTCTATAGACG                                                   |
|                               | 4-S               | ATTTAGTTGCCGACAAAAGTAAC                                                       |
|                               | 4-AS              | TCCTACACTCTGTCTCCCTATC                                                        |
|                               | 5-S               | GTGTGCACAAACCTCACCATTA                                                        |
|                               | 5-AS              | ACCAAATGTTGTGGAGAGAGATAAG                                                     |
| EMSA                          | P1-S              | AAGGTTGTACCATGACATCCCTGCTAGACACATGTCTCTCTCCCTAT-<br>CTCTCTTTAATTCT            |
|                               | P1-AS             | AGAATTAAGAGAGATAGGGAGAGAGACATGTGTCTAGCAGGATGT-<br>CATGGTACAACCTT              |
|                               | P2-S              | ATCATGTAGACAACACTCTAGCTAGAGAAGCTCTAGCATCGTCTATA-<br>GAAAACAGTTTGGACATGTTTTTGC |
|                               | P2-AS             | GCAAAAACATGTCCAACTGTTTTCTATAGACGATGCTAGAGCTTCT-<br>CTAGCTAGAGTGTGTCTACATGAT   |
|                               | P3-S              | GCCGACAAAAGTAACATAAATTTGTAATTATTAGATGTAAGACAG-<br>GAGATGAGATAGGGAGACAAGAG     |
|                               | P3-AS             | CTCTTGTCTCCCTATCTCATCTCCTGTCTTACATCTAATAATTACAA-<br>ATTATTAGTTACTTTTTGTCCGGC  |
|                               | P3-m-S            | GCCGCCAAAAGTAACATAAATTTGTAATTATTAGATGTAAGCCA-<br>GGAGATGAGATAGGGAGCCAAGAG     |
|                               | P3-m-AS           | CTCTTGGCTCCCTATCTCATCTCCTGGCTTACATCTAATAATTACA-<br>AATTATTAGTTACTTTTTGGCCGGC  |
|                               | P4-S              | CCATTAGATGATAAGTAGAAGACAAAACCTTACAGCCAAACAGGCAAA-<br>CTTATCTCTCTCC            |
|                               | P4-AS             | GGAGAGAGATAAGTTTGCCCTGTTTGGCTGTAAGTTTTGTCTTCTACT-<br>TATCATCTAATGG            |
| constructs                    |                   |                                                                               |
| pER10-bdl                     | BDL-1-S           | CCCCTCGAGATGCGTGGTGTGTGTCAGAAT                                                |
|                               | BDL-1-AS          | GGACTAGTCTAAACAGGGTTGTTCTTGTCTATCC                                            |
|                               | BDL-m-S           | AAGTCAAGTGGTAGGATGGTCACCAATTGGGTTACACAG                                       |
|                               | BDL-m-AS          | CTGTGTAACCAATTGGTGACCATCTACCACTTGACTT                                         |
| pCambia1300-nos               | nos-S             | GCCGGATCCGAATTCATGGGCCACTAGTTCGTTCAAACATT-<br>TGGAATAAAG                      |
|                               | nos-AS            | GGCCAATTGGCTGTCGAGGGGGGATCAATTCCC                                             |
| pCambia1300-pTMM-LUC-NLS-sGFP | TMM-PRO-S         | CCCAAAGCTTGTGTGCTCCATGGGCATGT                                                 |
|                               | TMM-PRO-AS        | AAACTGCAGTCTTAGTTGTTGTTGTTGTGTAATG                                            |
|                               | LUC-S             | AAACTGCAGGGCGCCATGGAAGACGCCAAAAACATAAAG                                       |
|                               | LUC-AS            | GGGGTCACCTAGGCCATGGGGCCCCACGGCGATCTTCCGCCCTTCTT                               |
|                               | NLS-sGFP-S        | AGGGGGCCCCAAAGAAGAAGAGAAGGTGGAAGATCCAATGAGTA-<br>AAG GAGAAGAACTTTTC           |
|                               | sGFP-AS           | GTATCCTAGGTTACAGCTCAGATCTTTTA                                                 |
| pCambia1300-pSTOMAGEN-LUC     | STOMAGEN-PRO-1-S  | GGGGTCGACTAGAAAAGATTTGATTCCCTAAACA                                            |
|                               | STOMAGEN-PRO-1-AS | GCCGGATCCCTCTACTTCTTCTTCTTCTT                                                 |
| pEarlyGate 164-pSTOMAGEN-GUS  | STOMAGEN-PRO-2-S  | CACCTAGAAAAGATTTGCTTCCCTAAACA                                                 |
|                               | STOMAGEN-PRO-2-AS | GGACTAGTTCTCTACTTCTTCTTCTTCTTGCCT                                             |
| 70S-MP-CFP                    | MP-1-S            | TCCCCCGGGATGATGGCTTCATTGTCT                                                   |
|                               | MP-1-AS           | GGACTAGTTGAAACAGAAGTCTTAAGATCGTTAATG                                          |
| pGreen0800-pSTOMAGEN-LUC      | STOMAGEN-PRO-S    | GGGGTCGACTAGAAAAGATTTGATTCCCTAAACA                                            |
|                               | STOMAGEN-PRO-AS   | GGACTAGTTCTCTACTTCTTCTTCTTCTTGCCT                                             |
| pGreen0800-pARR15-LUC         | ARR15-PRO-S       | GGGGTCGACTCGACGATTTCTCACAAACC                                                 |
|                               | ARR15-PRO-AS      | GGACTAGTTGTTTTCTCTCGGGAAAGTAAACA                                              |
